# Supplementary material
Source: PubMed Central journal article supplement (PMC4097637)
Supplement: IAI.00025-14_zii999090763so1.pdf [file IAI.00025-14_zii999090763so1.pdf]

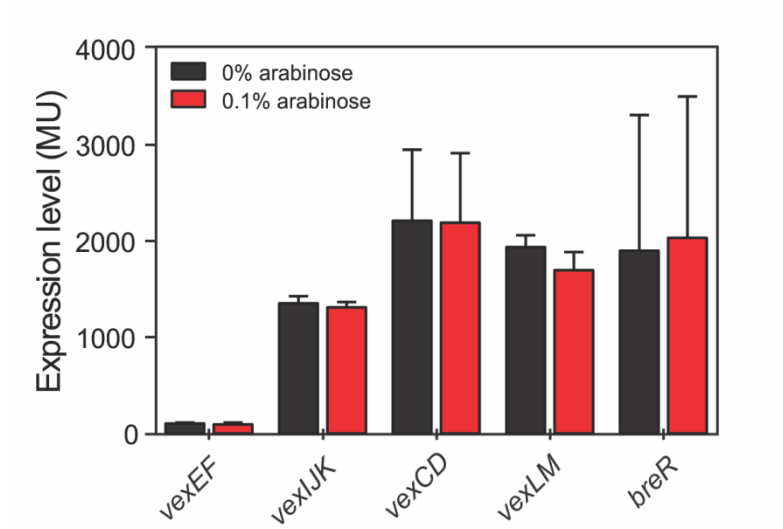

**Figure S1. Effect of CpxR on the expression of the indicated RND efflux systems.** *V. cholerae* containing the indicated RND efflux system reporter plasmids and pBAD33-*cpxR* were grown in LB broth in the presence or absence of arabinose as described in the methods. Following 4 h growth, triplicate aliquots from each culture were collected and assayed for  $\beta$ -galactosidase activity. The results are the mean and SD from three independent experiments.

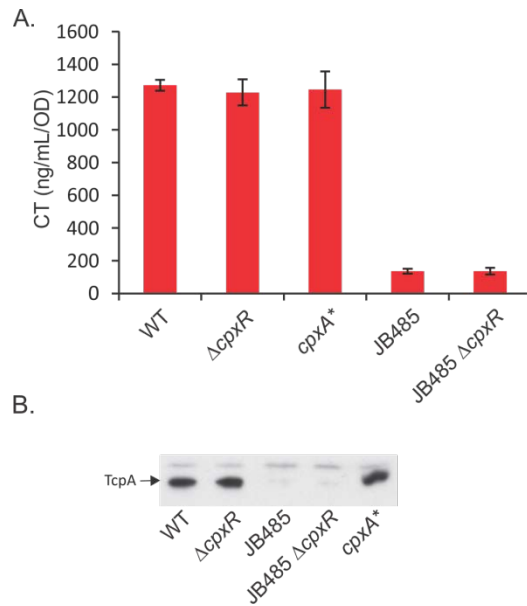

**Figure S2. Quantification of CT and TcpA production in *Vibrio cholerae* strains.** The indicated strains were grown under AKI growth conditions. Culture aliquots were collected following overnight growth and assayed for (A) CT production using a GM<sub>1</sub> ELISA and (B) TcpA production by Western blot using polyclonal antibody that was generated against TcpA.

**Table S1. Susceptibility of *Vibrio cholerae* strains to antimicrobial compounds by disk diffusion assays.**

| Strain        | Zone of growth inhibition <sup>a</sup> (SD) |             |            |             |             |       |             |                    |
|---------------|---------------------------------------------|-------------|------------|-------------|-------------|-------|-------------|--------------------|
|               | CuCl <sub>2</sub>                           | SAR         | DOC        | TET         | GENT        | PXB   | ERY         | AMP                |
| WT            | 25.3 (0.96)                                 | 17.7 (0.58) | 8.5 (1.29) | 26.5 (0.35) | 18.8 (0.40) | 0 (0) | 24.0 (1.63) | 10.0 (0.89)        |
| $\Delta cpxR$ | 25.5 (0.71)                                 | 15.0 (0)    | 8.0 (0)    | 28.3 (0.50) | 18.0 (0)    | 0 (0) | 23.5 (1.0)  | 9.4 (0.84)         |
| <i>cpxA</i> * | 25.3 (0.50)                                 | 16.3 (0.50) | 8.3 (0.96) | 26.0 (0.82) | 19.2 (0.75) | 0 (0) | 24.8 (2.75) | 0 (0) <sup>†</sup> |

<sup>a</sup>Zone of growth inhibition (measured in mm) to CuCl<sub>2</sub>, sarcosyl (SAR), deoxycholate (DOC), tetracycline (TET), gentamicin (GENT), polymixin B (PXB), erythromycin (ERY), and ampicillin (AMP). Student t-test was used to determine if differences were significant compared to WT: <sup>†</sup>P<0.0001.
